# Supplementary material
Source: publisher site journal article supplement (https://www.degruyterbrill.com/publication/isbn/9783110471069/downloadAsset/9783110471069_Programme.zip)
Supplement: Supplementary file 1 [file Hinweise.doc]

Hinweise für die Leser

Die Skripte (MATLAB-Programme) und Simulink-Modelle wurden mit der MATLAB-Version 2015a geschrieben bzw. getestet. Bei den Skripten treten keine Probleme auf, wenn ältere Versionen der Software benutzt werden. Die Simulink-Modelle werden konvertiert und mit einer weiteren Erweiterung gekennzeichnet.

Die Skripte und Simulink-Modelle sind kapitelweise sortiert. Grundsätzlich werden die Modelle aus MATLAB-Skripte aufgerufen. Diese enthalten am Anfang die Initialisierungen und Parametrierungen der Modelle, danach folgt der Aufruf der Simulation und weiter werden die Ergebnisse der Simulation im Skript bearbeitet und graphisch dargestellt.

Der Name des Skriptes und des entsprechenden Modells sind sehr ähnlich gewählt, so dass man leicht die Zugehörigkeit erkennt, wie z.B. ad_test_2.m (für das Skript) und ad_test2.slx (für das Modell).

Die Skripte und Modelle sind relativ einfach gestaltet, damit sie leicht verständlich sind. Sie sind nicht auf Effizienz getrimmt. Wegen der Verständlichkeit werden vielmals z.B. for-Schleifen statt Matrix-Operationen eingesetzt.

Bei MATLAB-Versionen, die Schwierigkeiten mit den Modellen haben, kann man diese mit der vorhandenen Version neu aufbauen. Es werden typische Blöcke eingesetzt, die in den älteren Versionen auch verfügbar sind. In der neuen Version sind sie nur in anderen Toolboxen enthalten.

Karlsruhe, 30.08.2016

Autoren
