# Supplementary material
Source: publisher site journal article supplement (https://www.degruyterbrill.com/publication/isbn/9783110471069/downloadAsset/9783110471069_Programme.zip)

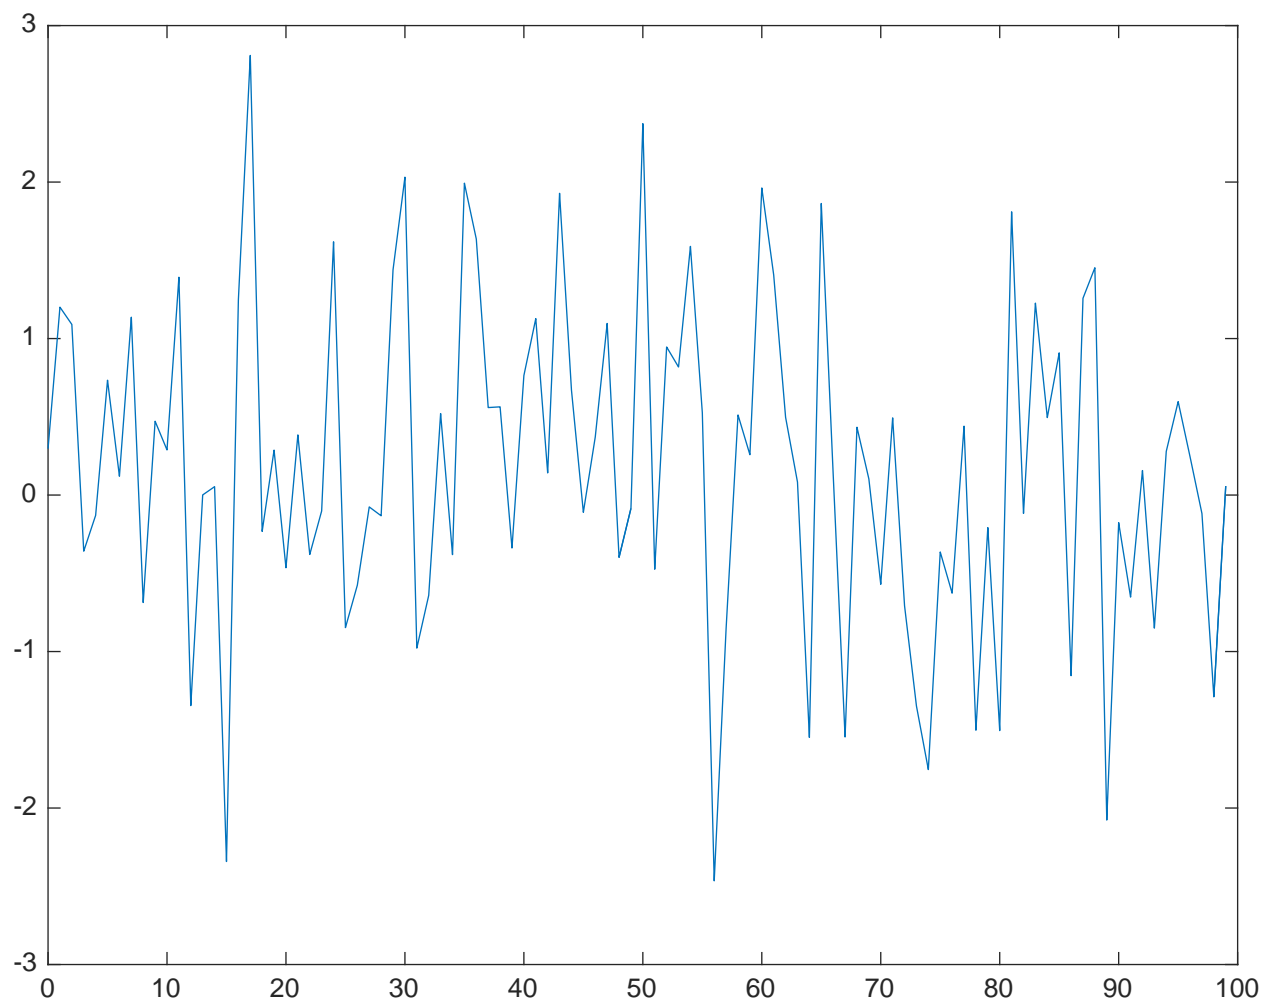

Supplement: Supplementary file 1 [file Bild_1_90_1.pdf › Programme/Kap_1/Bild_1_90_1.pdf]

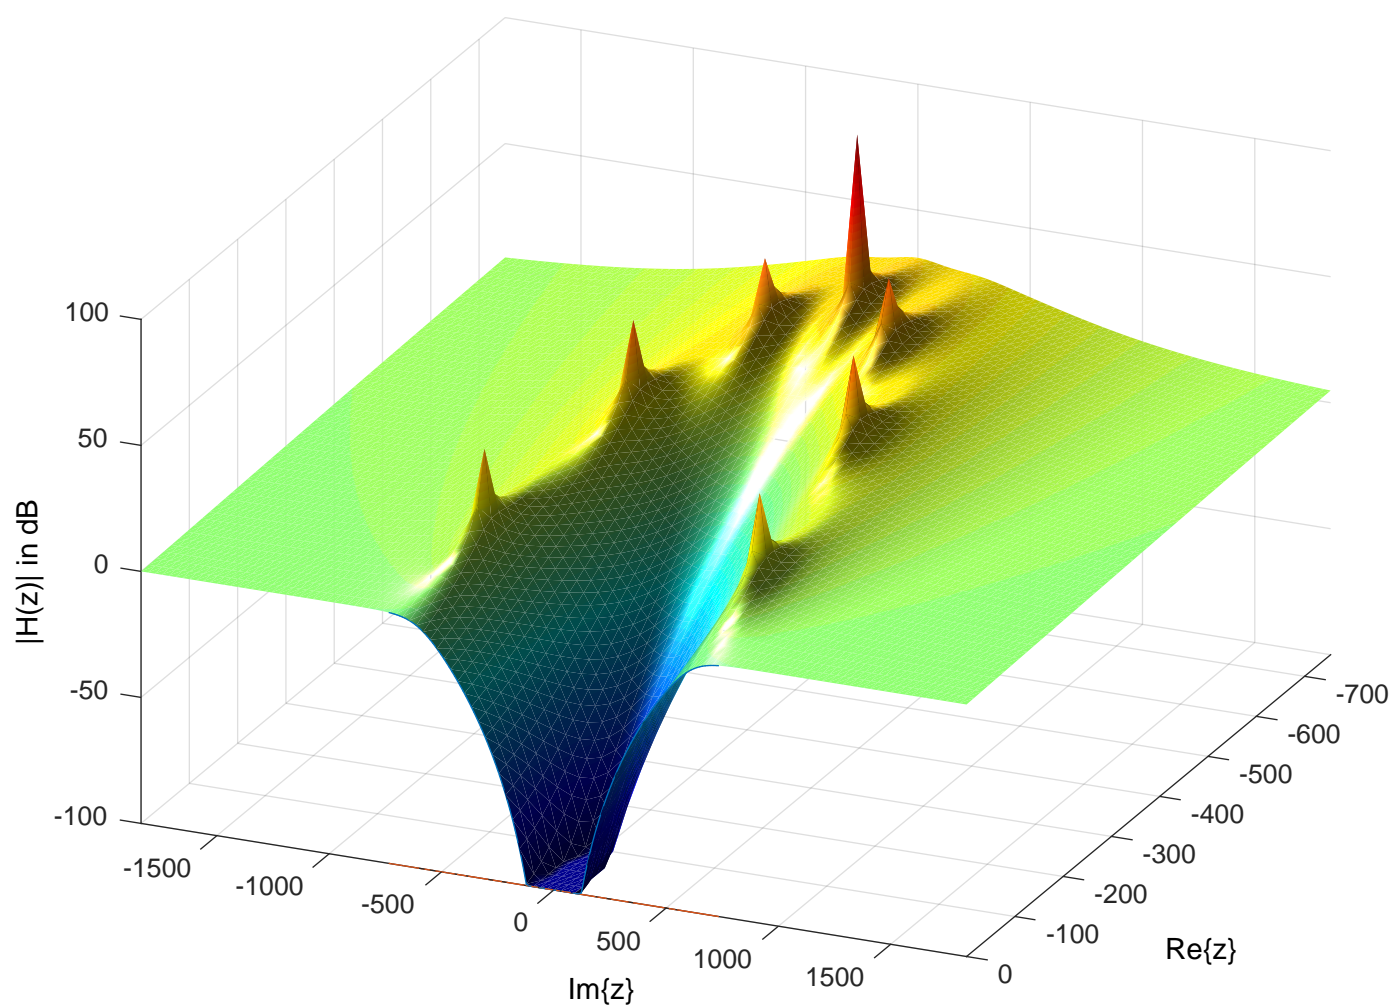

Supplement: Supplementary file 2 [file Bild_2_46_2.pdf › Programme/Kap_2/Bild_2_46_2.pdf]
